# Supplementary material for: A Head and Neck Cancer Tumor Response-Specific Gene Signature for Cisplatin, 5-Fluorouracil Induction Chemotherapy Fails with Added Taxanes
Source: PubMed Central journal article supplement (PMC3467249; doi:10.1371/journal.pone.0047170), 2012-10-09

ROC Curves for Individual Genes in the Signature (MA Analysis)

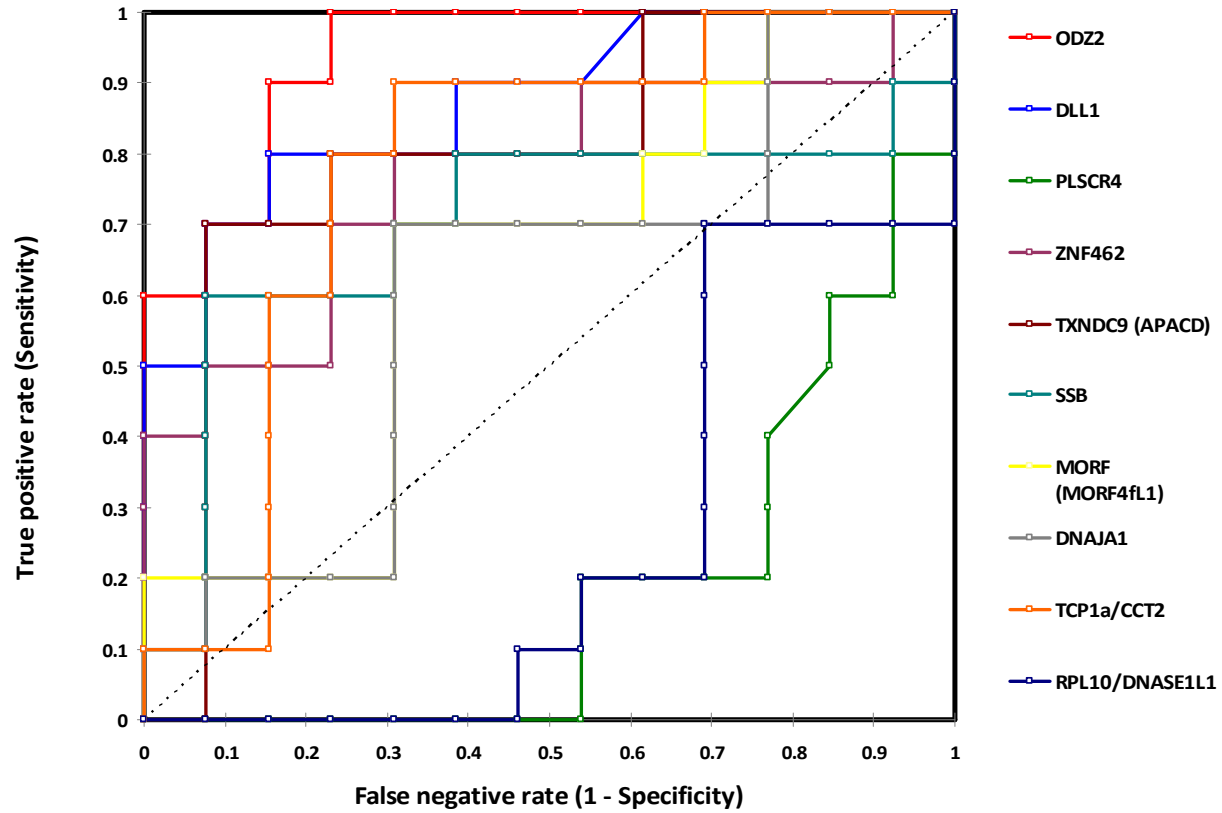

Supplement: pone.0047170.s001.pdf [file pone.0047170.s001.pdf]
