# Supplementary material for: A Head and Neck Cancer Tumor Response-Specific Gene Signature for Cisplatin, 5-Fluorouracil Induction Chemotherapy Fails with Added Taxanes
Source: PubMed Central journal article supplement (PMC3467249; doi:10.1371/journal.pone.0047170), 2012-10-09

Summary ROC Curve for Gene Signature (MA Analysis/23 patients) AUC=0.946

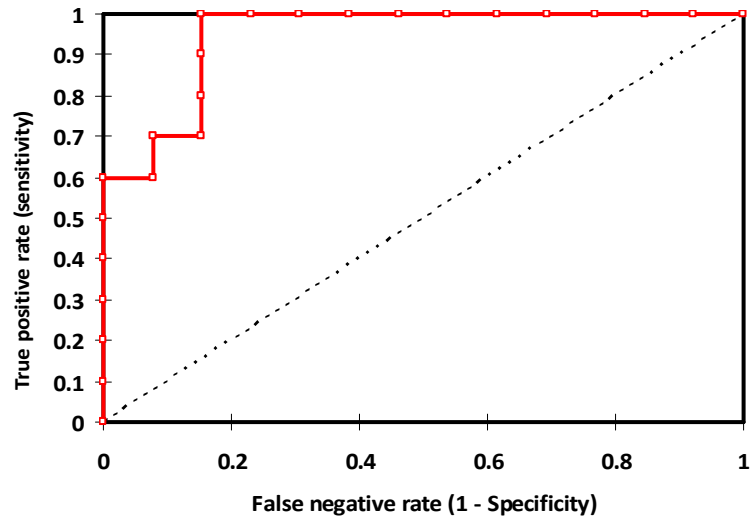

Summary ROC Curve for Gene Signature (TLDA Analysis/22 patients) AUC=0.985

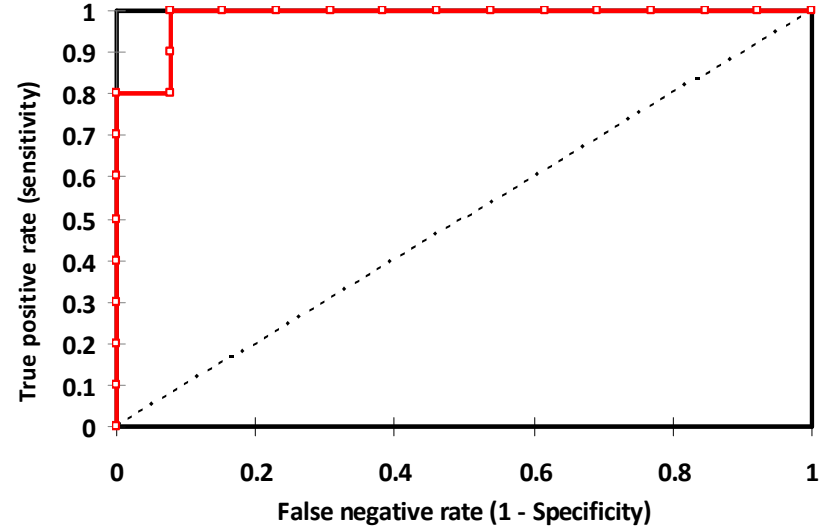

Summary ROC Curve for Gene Signature (TLDA Analysis/27 patients) AUC=0.990

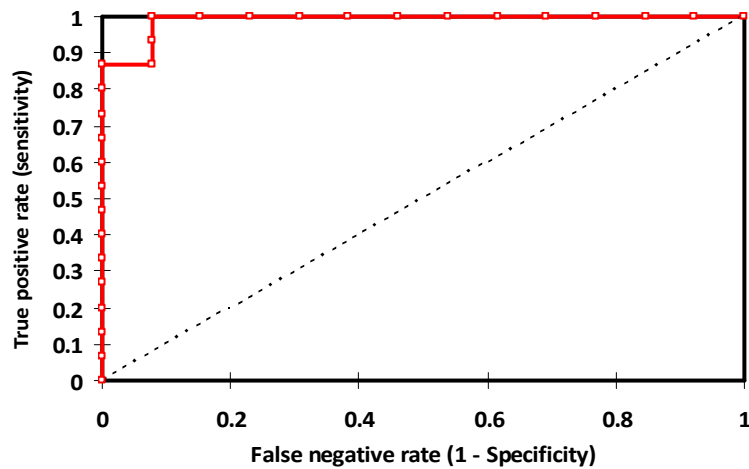

Summary ROC curve for Gene Signature and HPV status (TLDA Analysis/26 patients) AUC=0.967

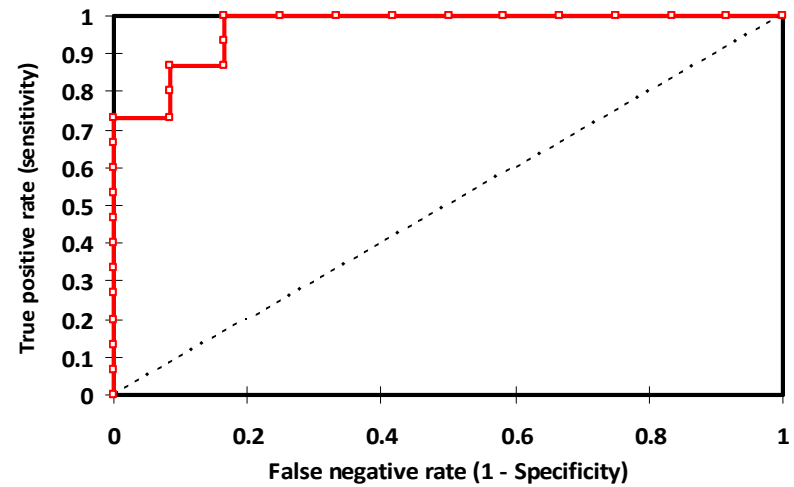

Supplement: pone.0047170.s002.pdf [file pone.0047170.s002.pdf]
