# Supplementary material for: A Head and Neck Cancer Tumor Response-Specific Gene Signature for Cisplatin, 5-Fluorouracil Induction Chemotherapy Fails with Added Taxanes
Source: PubMed Central journal article supplement (PMC3467249; doi:10.1371/journal.pone.0047170), 2012-10-09
Supplement: pone.0047170.s004.pdf [file pone.0047170.s004.pdf]

**Supplementary Table 1. TLDA Gene Expression Ratios**

| Treatment | PF               | PF               | PF                | PF                | PF                | PF                | PF                | PF                | PF                |
|-----------|------------------|------------------|-------------------|-------------------|-------------------|-------------------|-------------------|-------------------|-------------------|
| Gene Name | CCR_Biopsy<br>40 | CCR_Biopsy<br>57 | CCR_Biopsy<br>109 | CCR_Biopsy<br>110 | CCR_Biopsy<br>121 | CCR_Biopsy<br>130 | CCR_Biopsy<br>156 | CCR_Biopsy<br>157 | CCR_Biopsy<br>164 |
| ODZ2      | 0.007            | 0.796            | -3.556            | -2.989            | -2.653            | -4.573            | 0.632             | -0.486            | 1.181             |
| DDL1      | -2.644           | -1.181           | -0.062            | -1.718            | -1.626            | -2.523            | -0.042            | 0.247             | 0.257             |
| PLSCR4    | -1.639           | -0.252           | -0.201            | -0.537            | -3.000            | -1.450            | -2.608            | -1.635            | 1.098             |
| ZNF462    | -1.466           | -1.751           | -0.010            | -1.139            | -1.742            | -1.699            | -1.510            | -0.876            | 0.644             |
| TCP1      | -1.404           | -0.308           | -0.431            | -0.504            | -0.006            | -0.168            | -0.902            | -0.364            | 0.103             |
| TXNDC9    | 1.769            | 0.403            | 1.092             | 0.317             | 0.190             | 0.566             | 0.309             | 0.528             | 1.707             |
| RPL10     | -0.550           | 0.752            | 1.642             | 1.203             | 1.003             | 0.589             | -0.302            | 0.862             | 1.415             |
| SSB       | 1.009            | 1.610            | 1.811             | 1.289             | 1.439             | 1.510             | 1.356             | 1.659             | 2.408             |
| MORF4L1   | -5.573           | -3.556           | -2.548            | -2.868            | -4.878            | -3.381            | -4.238            | -3.556            | -2.265            |
| DNAJA1    | -1.446           | -1.255           | -0.086            | -0.913            | -1.415            | -0.826            | -1.404            | -0.327            | 0.399             |

| Treatment | PF                | PF                | PF                  | PF                  | PF              | PF               | PF               | PF               | PF               |
|-----------|-------------------|-------------------|---------------------|---------------------|-----------------|------------------|------------------|------------------|------------------|
| Gene Name | CCR_Biopsy<br>169 | CCR_Biopsy<br>195 | CCR_Biopsy<br>219_1 | CCR_Biopsy<br>219_2 | NR_Biopsy<br>48 | NR_Biopsy<br>140 | NR_Biopsy<br>143 | NR_Biopsy<br>159 | NR_Biopsy<br>198 |
| ODZ2      | 0.853             | -4.540            | 1.538               | 0.174               | 1.952           | 1.669            | 1.980            | 2.616            | 2.501            |
| DDL1      | 0.290             | -1.053            | 0.445               | -2.617              | 0.147           | 0.908            | 0.062            | 0.450            | -0.563           |
| PLSCR4    | -1.552            | -1.502            | -1.252              | -4.035              | -2.806          | -2.258           | -4.059           | -3.556           | -3.857           |
| ZNF462    | -0.313            | -1.811            | -0.527              | -2.635              | -1.396          | 0.256            | -1.165           | -0.919           | -1.617           |
| TCP1      | -0.240            | -0.494            | -0.178              | -1.911              | -0.219          | 0.051            | -0.464           | -0.687           | -0.234           |
| TXNDC9    | 1.141             | 0.356             | 0.805               | -0.561              | 1.236           | 1.428            | 1.009            | -0.019           | 0.472            |
| RPL10     | 0.701             | 0.993             | 1.286               | -1.114              | -0.517          | 1.851            | -1.102           | -0.963           | -0.742           |
| SSB       | 2.268             | 1.391             | 2.305               | 0.337               | 1.685           | 2.139            | 1.343            | 1.667            | 1.508            |
| MORF4L1   | -3.573            | -3.158            | -3.857              | -4.837              | -4.293          | -2.083           | -4.966           | -5.108           | -3.989           |
| DNAJA1    | -0.521            | -1.102            | -0.333              | -2.747              | -0.671          | 0.294            | -1.162           | -1.304           | -1.423           |

**Supplementary Table 1. TLDA Gene Expression Ratios**

| Treatment | PF               | PF               | PF               | PF               | PF               | PF              | PF              | PF              | PF               |
|-----------|------------------|------------------|------------------|------------------|------------------|-----------------|-----------------|-----------------|------------------|
| Gene Name | NR_Biopsy<br>210 | NR_Biopsy<br>223 | NR_Biopsy<br>246 | NR_Biopsy<br>302 | NR_Biopsy<br>303 | NR_Biopsy<br>27 | NR_Biopsy<br>39 | NR_Biopsy<br>76 | NR_Biopsy<br>318 |
| ODZ2      | -0.715           | -1.120           | 2.267            | 2.286            | 2.038            | 1.083           | 2.191           | 2.663           | 2.974            |
| DDL1      | 0.972            | 0.448            | 0.134            | 0.860            | 1.238            | -2.653          | -1.366          | 3.445           | 0.075            |
| PLSCR4    | -2.490           | -2.943           | -2.442           | -4.012           | -2.766           | -5.878          | -3.366          | -0.262          | -1.388           |
| ZNF462    | -0.462           | 0.385            | -0.708           | -1.446           | 0.367            | -2.943          | -2.608          | 2.070           | -0.233           |
| TCP1      | -1.311           | -0.184           | -0.333           | -0.667           | -0.293           | -1.653          | 0.107           | 3.111           | -0.228           |
| TXNDC9    | 0.604            | 0.641            | 1.010            | 0.353            | 0.754            | -0.407          | 4.016           | 1.912           | 0.878            |
| RPL10     | -0.111           | 1.804            | 0.633            | -0.946           | 0.665            | -1.837          | -1.474          | 8.464           | 0.636            |
| SSB       | 1.529            | 1.915            | 1.409            | 1.092            | 2.274            | 0.102           | -0.240          | -6.265          | 2.067            |
| MORF4L1   | -4.608           | -3.556           | -3.989           | -5.158           | -3.322           | -5.442          | -6.796          | 2.016           | -5.211           |
| DNAJA1    | -0.683           | -1.318           | -0.844           | -1.531           | -1.171           | -1.595          | -0.494          | 0.800           | -0.886           |

| Treatment | PF               | T1PF              | T1PF              | T1PF              | T1PF              | T1PF             | T1PF               | T1PF               | T1PF             |
|-----------|------------------|-------------------|-------------------|-------------------|-------------------|------------------|--------------------|--------------------|------------------|
| Gene Name | NR_Biopsy<br>329 | CCR_Biopsy<br>310 | CCR_Biopsy<br>323 | CCR_Biopsy<br>353 | CCR_Biopsy<br>374 | NR_Biopsy<br>138 | NR_Biopsy<br>162_1 | NR_Biopsy<br>162_2 | NR_Biopsy<br>174 |
| ODZ2      | 0.466            | 1.176             | -2.490            | 2.308             | 1.223             | 0.908            | 1.524              | 0.786              | 1.388            |
| DDL1      | 0.884            | 0.045             | -2.523            | -0.438            | -0.556            | -1.344           | -0.456             | -1.130             | -0.218           |
| PLSCR4    | -2.442           | -2.955            | -5.796            | -3.837            | -3.322            | -2.171           | -3.293             | -4.411             | -2.366           |
| ZNF462    | 1.193            | -0.771            | -4.108            | -1.531            | -0.955            | -1.065           | -0.203             | -1.454             | 0.345            |
| TCP1      | -0.751           | -0.229            | -2.482            | -0.913            | -0.749            | -0.214           | -0.417             | -0.500             | -0.152           |
| TXNDC9    | 0.875            | 1.155             | -0.095            | -0.006            | 0.282             | 0.881            | 0.898              | 0.089              | 1.000            |
| RPL10     | 0.876            | 0.446             | -2.699            | -0.219            | -1.086            | 0.329            | 1.396              | 1.085              | 1.193            |
| SSB       | 0.809            | 0.864             | -1.653            | 1.202             | 1.559             | 0.362            | 0.999              | 1.737              | 1.943            |
| MORF4L1   | -3.699           | -4.035            | -5.012            | -3.837            | -3.900            | -3.966           | -4.474             | -4.796             | -2.708           |
| DNAJA1    | -1.047           | -1.221            | -2.474            | -0.924            | -1.411            | -0.983           | -0.798             | -1.671             | -0.653           |

**Supplementary Table 1. TLDA Gene Expression Ratios**

| Treatment | T1PF             | T2PF              | T2PF              | T2PF              | T2PF              | T2PF              | T2PF              | T2PF             | T2PF             |
|-----------|------------------|-------------------|-------------------|-------------------|-------------------|-------------------|-------------------|------------------|------------------|
| Gene Name | NR_Biopsy<br>350 | CCR_Biopsy<br>387 | CCR_Biopsy<br>395 | CCR_Biopsy<br>413 | CCR_Biopsy<br>416 | CCR_Biopsy<br>417 | CCR_Biopsy<br>419 | NR_Biopsy<br>213 | NR_Biopsy<br>427 |
| ODZ2      | -0.783           | 0.898             | -2.727            | 0.847             | 0.148             | 1.580             | 2.580             | -0.440           | 1.848            |
| DDL1      | -1.427           | 0.707             | -1.165            | -2.388            | 0.577             | -0.170            | -0.146            | -0.916           | -1.842           |
| PLSCR4    | -2.796           | -1.582            | -2.868            | -3.756            | -1.811            | -2.366            | -3.035            | -2.041           | -1.911           |
| ZNF462    | -0.798           | 0.529             | -0.935            | -2.336            | 0.324             | -0.535            | -1.265            | -1.188           | -1.123           |
| TCP1      | -0.884           | 0.171             | -0.701            | -1.949            | 0.302             | -0.468            | -0.943            | 0.225            | -0.897           |
| TXNDC9    | 0.163            | 1.586             | 0.629             | 0.377             | 1.521             | 1.010             | 0.141             | 1.543            | 0.986            |
| RPL10     | -0.595           | 1.207             | 0.497             | -0.377            | 2.261             | 0.418             | 0.193             | 0.849            | -0.687           |
| SSB       | 1.659            | 1.454             | 1.254             | -0.357            | 2.416             | 1.096             | 1.899             | 1.987            | 1.126            |
| MORF4L1   | -4.756           | -3.023            | -3.171            | -4.035            | -3.108            | -3.989            | -3.626            | -4.035           | -4.506           |
| DNAJA1    | -0.788           | -0.149            | -0.580            | -1.732            | -0.102            | -0.727            | -0.241            | -0.868           | -1.111           |

There was insufficient material from CCR\_Biopsy\_23 for analysis by TLDA; PF=Cisplatin/5FU; T1PF=Cisplatin/5FU/Placitaxel;  
T2PF=Cisplatin/5FU/Docetaxel

The values correspond to the normalized log<sub>2</sub> ratios sample/reference
