# Supplementary material for: A Head and Neck Cancer Tumor Response-Specific Gene Signature for Cisplatin, 5-Fluorouracil Induction Chemotherapy Fails with Added Taxanes
Source: PubMed Central journal article supplement (PMC3467249; doi:10.1371/journal.pone.0047170), 2012-10-09
Supplement: pone.0047170.s005.pdf [file pone.0047170.s005.pdf]

**Supplementary Table 2. GO Functions of Proteins Associating with Members of the Gene Signature**

| <b>PROTEIN ID</b> | <b>FULL NAME</b>                            | <b>GO FUNCTION</b>                                                                                                                                                                                                                                                         |
|-------------------|---------------------------------------------|----------------------------------------------------------------------------------------------------------------------------------------------------------------------------------------------------------------------------------------------------------------------------|
| <b>ACTL6A</b>     | Actin-like 6A                               | ATP binding, chromatin binding, protein binding, transcription coactivator activity                                                                                                                                                                                        |
| <b>SRCAP</b>      | Snf2-related CREBBP activator protein       | ATP binding, DNA binding, helicase activity, histone acetyltransferase activity, hydrolase activity, nucleotide binding, transcription coactivator activity                                                                                                                |
| <b>EPC1</b>       | Enhancer of polycomb homolog 1              | Contributes to histone acetyltransferase activity                                                                                                                                                                                                                          |
| <b>KAT5</b>       | K(lysine) acetyltransferase 5               | Androgen receptor binding, contributes to histone acetyltransferase activity, metal ion binding, protein binding, repressing transcription factor binding, transcription coactivator activity, transferase activity, transferring acyl groups other than amino-acyl groups |
| <b>MDM2</b>       | p53 binding protein homolog                 | Enzyme binding, ligase activity, metal ion binding, p53 binding, protein binding, ubiquitin-protein ligase activity, zinc ion binding                                                                                                                                      |
| <b>RUVBL1</b>     | RuvB-like 1                                 | ATP binding, NOT ATPase activity, DNA helicase activity, hydrolase activity, nucleotide binding, protein binding                                                                                                                                                           |
| <b>RUVBL2</b>     | RuvB-like 2                                 | ATP binding, ATP-dependent DNA helicase activity, contributes to ATPase activity, DNA helicase activity, damaged DNA binding hydrolase activity, identical protein binding, nucleotide binding, protein binding, unfolded protein binding                                  |
| <b>CHD3</b>       | Chromodomain helicase DNA binding protein 3 | ATP binding, ATP-dependent DNA helicase activity, DNA binding, helicase activity, hydrolase activity, acting on acid anhydrides, in phosphorus-                                                                                                                            |

|                 |                                              |                                                                                                                                                                                                                                                                                                                                                                                                                                                                                                                                                                          |
|-----------------|----------------------------------------------|--------------------------------------------------------------------------------------------------------------------------------------------------------------------------------------------------------------------------------------------------------------------------------------------------------------------------------------------------------------------------------------------------------------------------------------------------------------------------------------------------------------------------------------------------------------------------|
|                 |                                              | containing anhydrides, metal ion binding, nucleotide binding, protein binding, zinc ion binding                                                                                                                                                                                                                                                                                                                                                                                                                                                                          |
| <b>ING3</b>     | Inhibitor of growth family, member 3         | Contributes to histone acetyltransferase activity, metal ion binding, methylated histone residue binding, zinc ion binding                                                                                                                                                                                                                                                                                                                                                                                                                                               |
| <b>DMAP1</b>    | DNA methyltransferase 1 associated protein 1 | DNA binding, RNA polymerase II repressing transcription factor binding, methyltransferase activity, protein binding, transcription corepressor activity, transferase activity                                                                                                                                                                                                                                                                                                                                                                                            |
| <b>C20orf20</b> | Chromosome 20 open reading frame 20          | Chromatin modification, regulation of growth, regulation of transcription, DNA-dependent                                                                                                                                                                                                                                                                                                                                                                                                                                                                                 |
| <b>HDAC1</b>    | HDAC2 histone deacetylase 1                  | NAD-dependent histone deacetylase activity (H3-K14 specific), NAD-dependent histone deacetylase activity (H3-K9 specific), NAD-dependent histone deacetylase activity (H4-K16 specific), RNA polymerase II transcription corepressor activity, activating transcription factor binding, core promoter binding, enzyme binding, histone deacetylase activity (H3-K16 specific), histone deacetylase binding, hydrolase activity, protein binding, protein deacetylase activity, sequence-specific DNA binding transcription factor activity, transcription factor binding |
| <b>HDAC2</b>    | HDAC2 histone deacetylase 2                  | NAD-dependent histone deacetylase activity (H3-K14 specific), NAD-dependent histone deacetylase activity (H3-K9 specific), NAD-dependent histone deacetylase activity (H4-K16 specific), chromatin binding, enzyme binding, histone deacetylase activity, histone deacetylase activity (H3-K16                                                                                                                                                                                                                                                                           |

|                |                                                                                          |                                                                                                                                                                                                                                                                                                                                                                                                                                                                         |
|----------------|------------------------------------------------------------------------------------------|-------------------------------------------------------------------------------------------------------------------------------------------------------------------------------------------------------------------------------------------------------------------------------------------------------------------------------------------------------------------------------------------------------------------------------------------------------------------------|
|                |                                                                                          | specific), hydrolase activity, protein binding, protein deacetylase activity, sequence-specific DNA binding, transcription factor binding                                                                                                                                                                                                                                                                                                                               |
| <b>HDAC5</b>   | HDAC2 histone deacetylase 5                                                              | NAD-dependent histone deacetylase activity (H3-K14 specific), NAD-dependent histone deacetylase activity (H3-K9 specific), NAD-dependent histone deacetylase activity (H4-K16 specific), histone deacetylase activity, histone deacetylase activity (H3-K16 specific), hydrolase activity, protein binding, protein kinase C binding, repressing transcription factor binding, transcription factor binding, contributes to transcription regulatory region DNA binding |
| <b>YBX1</b>    | Y box binding protein 1                                                                  | DNA binding, RNA binding, double-stranded DNA binding, protein binding, sequence-specific DNA binding transcription factor activity, single-stranded DNA binding                                                                                                                                                                                                                                                                                                        |
| <b>PPP2R2D</b> | Protein phosphatase 2, regulatory subunit B, delta                                       | Phosphatidate phosphatase activity, protein phosphatase type 2A regulator activity                                                                                                                                                                                                                                                                                                                                                                                      |
| <b>PSEN1</b>   | Presenilin 1                                                                             | PDZ domain binding, aspartic-type endopeptidase activity, beta-catenin binding, cadherin binding, calcium channel activity, endopeptidase activity, peptidase activity, protein binding                                                                                                                                                                                                                                                                                 |
| <b>YWHAZ</b>   | Tyrosine 3-monooxygenase/tryptophan 5-monooxygenase activation protein, zeta polypeptide | Protein binding, protein domain specific binding, transcription factor binding                                                                                                                                                                                                                                                                                                                                                                                          |

|                |                                                                                           |                                                                                                                                                                                                                                                                                                                                                                                                                                                                                                                    |
|----------------|-------------------------------------------------------------------------------------------|--------------------------------------------------------------------------------------------------------------------------------------------------------------------------------------------------------------------------------------------------------------------------------------------------------------------------------------------------------------------------------------------------------------------------------------------------------------------------------------------------------------------|
| <b>YWHAQ</b>   | Tyrosine 3-monooxygenase/tryptophan 5-monooxygenase activation protein, theta polypeptide | Protein N-terminus binding, protein binding, protein domain specific binding                                                                                                                                                                                                                                                                                                                                                                                                                                       |
| <b>MAP3K1</b>  | Mitogen-activated protein kinase kinase kinase 1                                          | ATP binding, JUN kinase binding, JUN kinase kinase kinase activity, MAP kinase kinase kinase activity, MAP/ERK kinase kinase activity, identical protein binding, metal ion binding, mitogen-activated protein kinase binding, mitogen-activated protein kinase kinase binding, nucleotide binding, protein binding, protein kinase activity, protein kinase activity, protein kinase binding, protein serine/threonine kinase activity, sphingolipid binding, ubiquitin-protein ligase activity, zinc ion binding |
| <b>MAP3K14</b> | Mitogen-activated protein kinase kinase kinase 14                                         | ATP binding, MAP kinase kinase kinase activity, NF-kappaB-inducing kinase activity, nucleotide binding, protein binding, protein kinase activity, protein serine/threonine kinase activity                                                                                                                                                                                                                                                                                                                         |
| <b>TAB1</b>    | TGF-beta activated kinase 1/MAP3K7 binding protein 1                                      | Catalytic activity, enzyme activator activity, kinase activator activity, protein binding                                                                                                                                                                                                                                                                                                                                                                                                                          |
| <b>TAB2</b>    | TGF-beta activated kinase 1/MAP3K7 binding protein 2                                      | K63-linked polyubiquitin binding, metal ion binding, protein binding, zinc ion binding                                                                                                                                                                                                                                                                                                                                                                                                                             |
| <b>HSPA8</b>   | Heat shock 70kDa protein 8                                                                | ATP binding, ATPase activity, coupled, nucleotide binding, protein binding                                                                                                                                                                                                                                                                                                                                                                                                                                         |
| <b>TUBB</b>    | Tubulin, beta class I                                                                     | GTP binding, GTPase activity, MHC class I protein binding, nucleotide binding, peptide binding, protein complex binding, structural constituent of                                                                                                                                                                                                                                                                                                                                                                 |

|              |                                        |                                                                        |
|--------------|----------------------------------------|------------------------------------------------------------------------|
|              |                                        | cytoskeleton, structural molecule activity                             |
| <b>NOP56</b> | Ribonucleoprotein homolog              | RNA binding, protein binding, snoRNA binding                           |
| <b>SIN3B</b> | SIN3 transcription regulator homolog B | Chromatin binding, protein binding, transcription corepressor activity |
